# Supplementary material
Source: PubMed Central journal article supplement (PMC3819166)
Supplement: NIHMS523181-supplement-Supporting_Information.pdf [file NIHMS523181-supplement-Supporting_Information.pdf]

**Salicylic Acid and Analogs: Diamagnetic Chemical Exchange Saturation Transfer (diaCEST) Magnetic Resonance Imaging (MRI) Contrast Agents with Highly Shifted Exchangeable Protons**

Xing Yang<sup>1#</sup>, Xiaolei Song<sup>1,2#</sup>, Yuguo Li<sup>1,2</sup>, Guanshu Liu<sup>1,2</sup>, Sangeeta Ray<sup>1</sup>, Martin G. Pomper<sup>1\*</sup>,  
Michael T. McMahon<sup>1,2\*</sup>

<sup>1</sup>Russell H. Morgan Department of Radiology The Johns Hopkins University School of Medicine, Baltimore, Maryland, USA.

<sup>2</sup>F.M. Kirby Research Center for Functional Brain Imaging, Kennedy Krieger Institute, Baltimore, Maryland, USA.

**SUPPORTING INFORMATION**

|           |                                                                      |            |
|-----------|----------------------------------------------------------------------|------------|
| <b>1.</b> | <b>GENERAL</b>                                                       | <b>S1</b>  |
| <b>2.</b> | <b><sup>1</sup>H-NMR SPECTRUM OF SALICYLIC ACID IN WATER</b>         | <b>S2</b>  |
| <b>3.</b> | <b>Z-SPECTRA OF SALICYLIC ACID AT DIFFERENT PH AND CONCENTRATION</b> | <b>S3</b>  |
| <b>4.</b> | <b>PROTON EXCHANGE RATE OF SALICYLIC ACID AT DIFFERENT PH</b>        | <b>S4</b>  |
| <b>5.</b> | <b>Z-SPECTRA OF SALICYLIC ACID ANALOGUES</b>                         | <b>S6</b>  |
| <b>6.</b> | <b>IN VIVO DATA</b>                                                  | <b>S8</b>  |
| <b>7</b>  | <b>REFERENCE</b>                                                     | <b>S12</b> |

## 1. GENERAL

**Phantom Preparation:** All compounds were purchased from Sigma Aldrich (St. Louis, MO). Samples were dissolved in 0.01M phosphate-buffered saline (PBS) at the desired concentrations, and titrated using high concentration HCl/NaOH to the desired pH. The solutions were placed into 1 mm glass capillaries and assembled in a holder for CEST MR imaging. The samples were kept in 37°C during imaging. Phantom CEST experiments were taken on a Bruker 11.7 Tesla vertical MR scanner, using a 20 mm birdcage transmit/receive coil. CEST images were acquired using a RARE (RARE = 8) sequence with CW saturation pulse length of 3 seconds and saturation field strength ( $\omega_1$ ) from 1.2  $\mu$ T to 14.4  $\mu$ T. The CEST Z-spectra were acquired by incrementing saturation frequency every 0.3 ppm from -15 to 15 ppm for phantoms; TR = 6 s, effective TE = 17 ms, matrix size = 64x48 and slice thickness of 1.2 mm.

**Animal Imaging:** BALB/c mice weighing 20–25 g (Charles River Laboratories, Wilmington, MA) were maintained under specific pathogen free conditions in the animal facility of Johns Hopkins University. For MRI, mice were anesthetized by using 0.5–2% isoflurane and placed in a 23 mm transmit/receive mouse coil. Breath rate was monitored throughout in vivo MRI experiments using a respiratory probe. A 60  $\mu$ L volume of a 0.25 M salicylic acid solution in PBS (pH 7) was slowly injected *via* a catheter into the tail vein. In vivo images were acquired on a Bruker Biospec 11.7 T horizontal MR scanner, with one axial slice (1.5 mm thick) crossing both renal centre chosen for CEST screening. CEST images were acquired both pre- and post-injection. Image parameters were similar to those for the phantom except for TR/TE = 5s/15 ms, with optimized  $\omega_1 = 7.2 \mu$ T.

## 2. <sup>1</sup>H-NMR SPECTRUM OF SALICYLIC ACID IN WATER

Salicylic acid (**1**) was dissolved in 0.01 M PBS with 10% deuterium oxide at the concentration of 25 mM and titrated with HCl/NaOH to pH 7.0. The <sup>1</sup>H-NMR was acquired on a 500M Bruker NMR spectrometer at room temperature. The spectra and proton assignment are shown in Figure S1. The C2-OH exchangeable proton was clearly observed at chemical shift 14 ppm from TMS.

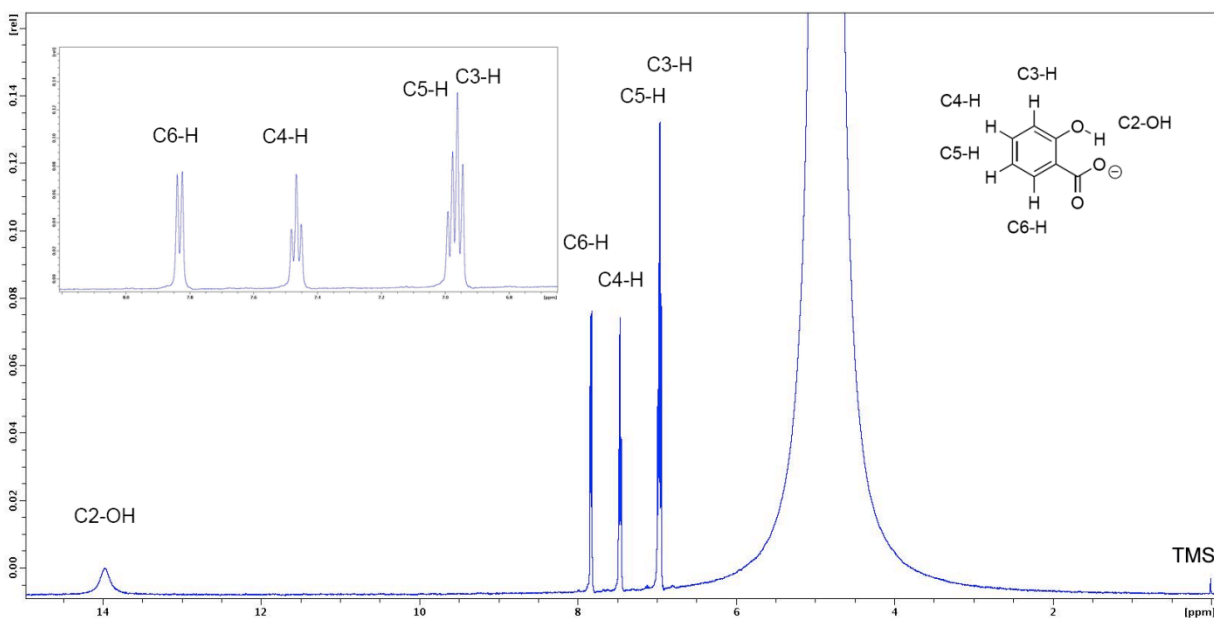

**Figure S1.** <sup>1</sup>H-NMR of salicylic acid (**1**) in water.

### 3. Z-SPECTRA OF SALICYLIC ACID AT DIFFERENT pH AND CONCENTRATION

A) The effect of pH on the contrast of salicylic acid (**1**) was tested at a concentration of 25 mM,  $\omega_1 = 7.2 \mu\text{T}$ . The Z-spectra and  $\text{MTR}_{\text{asym}}$  of pH 5.8, 6.5, 6.8, 7.2, 7.6, 8.1, 11.7 were collected and shown in Figure S2. Maximal contrast was observed between pH 6.5 and 7.0.

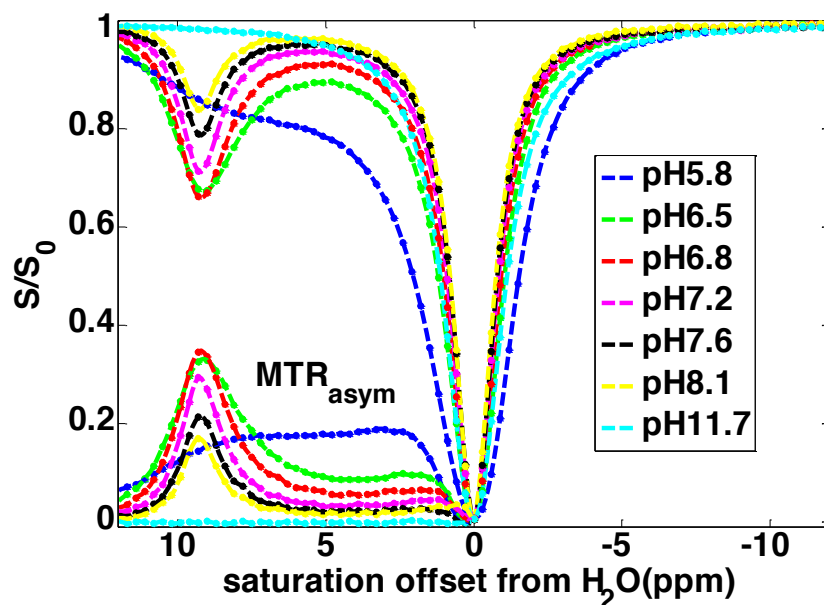

Figure S2. pH effect on the contrast of salicylic acid (**1**)

B) The concentration dependence of the contrast of salicylic acid (**1**) at pH 7.3-7.4 was measured at a saturation field strength ( $\omega_1$ ) = 7.2  $\mu\text{T}$ . The Z-spectra and  $\text{MTR}_{\text{asym}}$  spectra at concentrations 1.5 mM, 3.1 mM, 6.3 mM, 12.5 mM, 25.0 mM and 50.0 mM were collected and are shown below. 4% contrast was obtained at 1.50 mM.

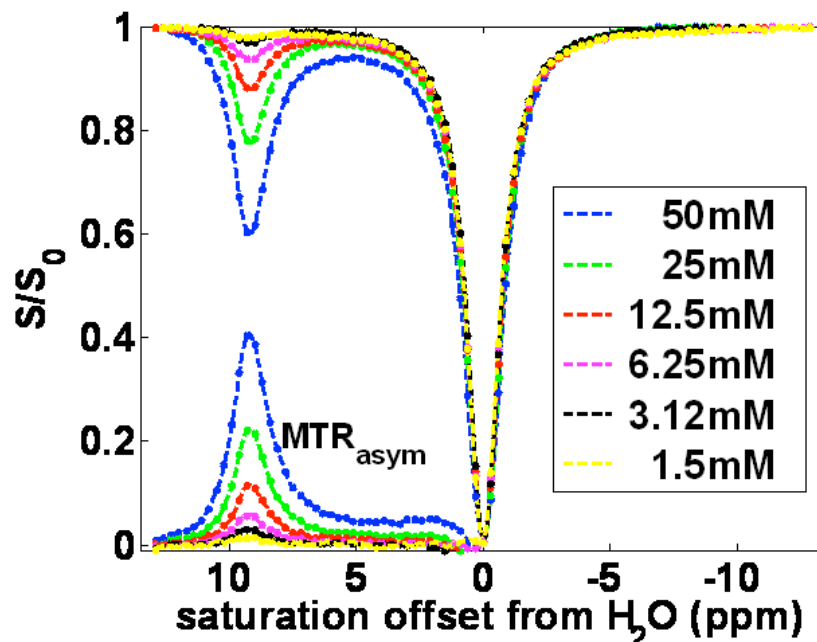

**Figure S2.** Concentration effect on the contrast of salicylic acid (**1**)

#### 4. PROTON EXCHANGE OF SALICYLIC ACID AT DIFFERENT pH

QUESP datasets for salicylic acid (**1**) at 9.3 ppm were collected as a function of pH using  $\omega_1 = 1.2 \mu\text{T}$ ,  $2.4 \mu\text{T}$ ,  $3.6 \mu\text{T}$ ,  $5.4 \mu\text{T}$ ,  $7.2 \mu\text{T}$ ,  $10.8 \mu\text{T}$  and  $11.4 \mu\text{T}$ . The solvent to water exchange rate ( $k_{sw}$ ) was calculated according to fitting to a 2-pool Bloch equation model.<sup>[1]</sup> The parameters for all fitting were:  $R_{1w} = 0.3$ ,  $R_{2w} = 0.6$ ,  $R_{1s} = 0.71$ ,  $R_{2s} = 39$ ,  $T_{\text{sat}} = 3\text{s}$ . The results at pH 5.8, 6.2, 6.5, 7.0, 7.4 and 7.8 were summarized in Table S1.

**Table S1.** The calculated proton exchange rate of salicylic acid (**1**) at different pH.

| entry | pH  | QUESP fitting <sup>[1]</sup> | Exchange rate (k/sec.) |
|-------|-----|------------------------------|------------------------|
| 1     | 5.8 |                              | 9.7                    |

|   |     |                                                                                                                                                                                                                                                                                                                                                                                                                                                                                                                                    |     |
|---|-----|------------------------------------------------------------------------------------------------------------------------------------------------------------------------------------------------------------------------------------------------------------------------------------------------------------------------------------------------------------------------------------------------------------------------------------------------------------------------------------------------------------------------------------|-----|
| 2 | 6.2 | 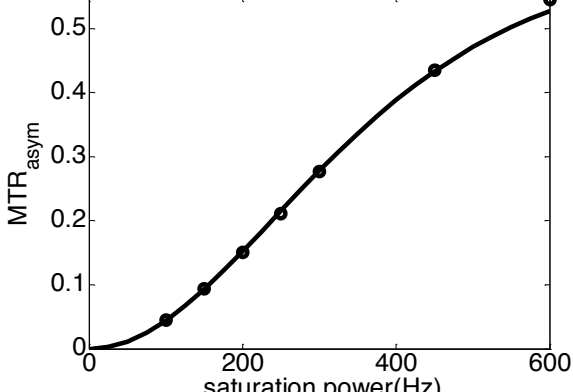 <p>A line graph showing the relationship between saturation power (Hz) on the x-axis and <math>MTR_{asym}</math> on the y-axis. The x-axis ranges from 0 to 600 Hz with major ticks at 0, 200, 400, and 600. The y-axis ranges from 0 to 0.5 with major ticks at 0, 0.1, 0.2, 0.3, 0.4, and 0.5. The data points are connected by a smooth curve that starts at (0,0) and increases monotonically, reaching approximately 0.52 at 600 Hz.</p>   | 4.2 |
| 3 | 6.5 |  <p>A line graph showing the relationship between saturation power (Hz) on the x-axis and <math>MTR_{asym}</math> on the y-axis. The x-axis ranges from 0 to 600 Hz with major ticks at 0, 200, 400, and 600. The y-axis ranges from 0 to 0.5 with major ticks at 0, 0.1, 0.2, 0.3, 0.4, and 0.5. The data points are connected by a smooth curve that starts at (0,0) and increases monotonically, reaching approximately 0.52 at 600 Hz.</p>  | 2.4 |
| 4 | 7.0 |  <p>A line graph showing the relationship between saturation power (Hz) on the x-axis and <math>MTR_{asym}</math> on the y-axis. The x-axis ranges from 0 to 600 Hz with major ticks at 0, 200, 400, and 600. The y-axis ranges from 0 to 0.5 with major ticks at 0, 0.1, 0.2, 0.3, 0.4, and 0.5. The data points are connected by a smooth curve that starts at (0,0) and increases monotonically, reaching approximately 0.36 at 600 Hz.</p> | 1.2 |
| 5 | 7.4 |  <p>A line graph showing the relationship between saturation power (Hz) on the x-axis and <math>MTR_{asym}</math> on the y-axis. The x-axis ranges from 0 to 600 Hz with major ticks at 0, 200, 400, and 600. The y-axis ranges from 0 to 0.5 with major ticks at 0, 0.1, 0.2, 0.3, 0.4, and 0.5. The data points are connected by a smooth curve that starts at (0,0) and increases monotonically, reaching approximately 0.22 at 600 Hz.</p> | 0.6 |

|   |     |  |     |
|---|-----|--|-----|
| 6 | 7.8 |  | 0.4 |
|---|-----|--|-----|

### 5. Z-SPECTRA OF SALICYLIC ACID ANALOGUES

25 mM salicylic acid analogs (**4** – **11**) were made at pH 7.1-7.4 and tested with the phantom condition as mentioned in general section. The Z-spectra were obtained by using  $T_{\text{sat}} = 3$  sec,  $\omega_1 = 3.6$   $\mu\text{T}$  at 37 °C. The Z-spectra,  $MTR_{\text{asym}}$  and QUESP curve are listed in the Table S2.

**Table S2.** The Z-spectra and  $MTR_{\text{asym}}$  of salicylic acid analogs

| Compound     | Z-spectra and $MTR_{\text{asym}}$ | Exchange rate fitting |
|--------------|-----------------------------------|-----------------------|
| <br><b>4</b> |                                   |                       |

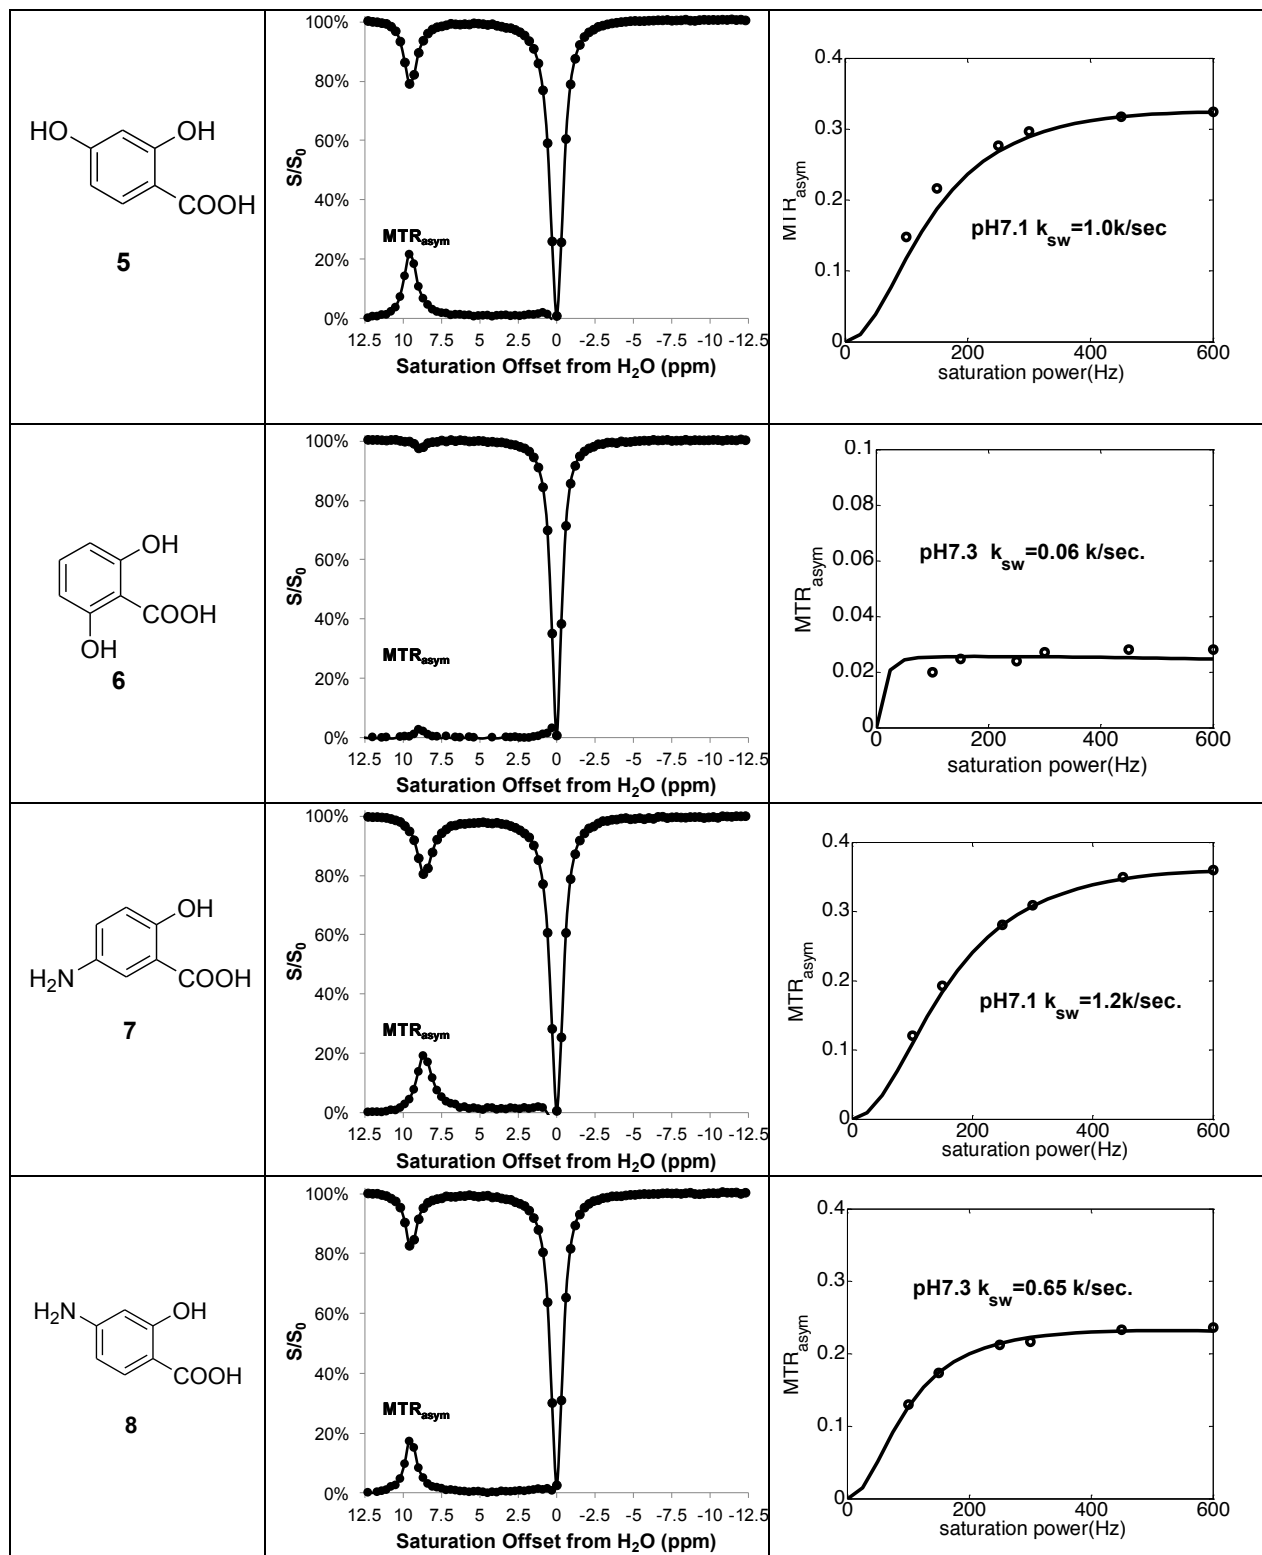

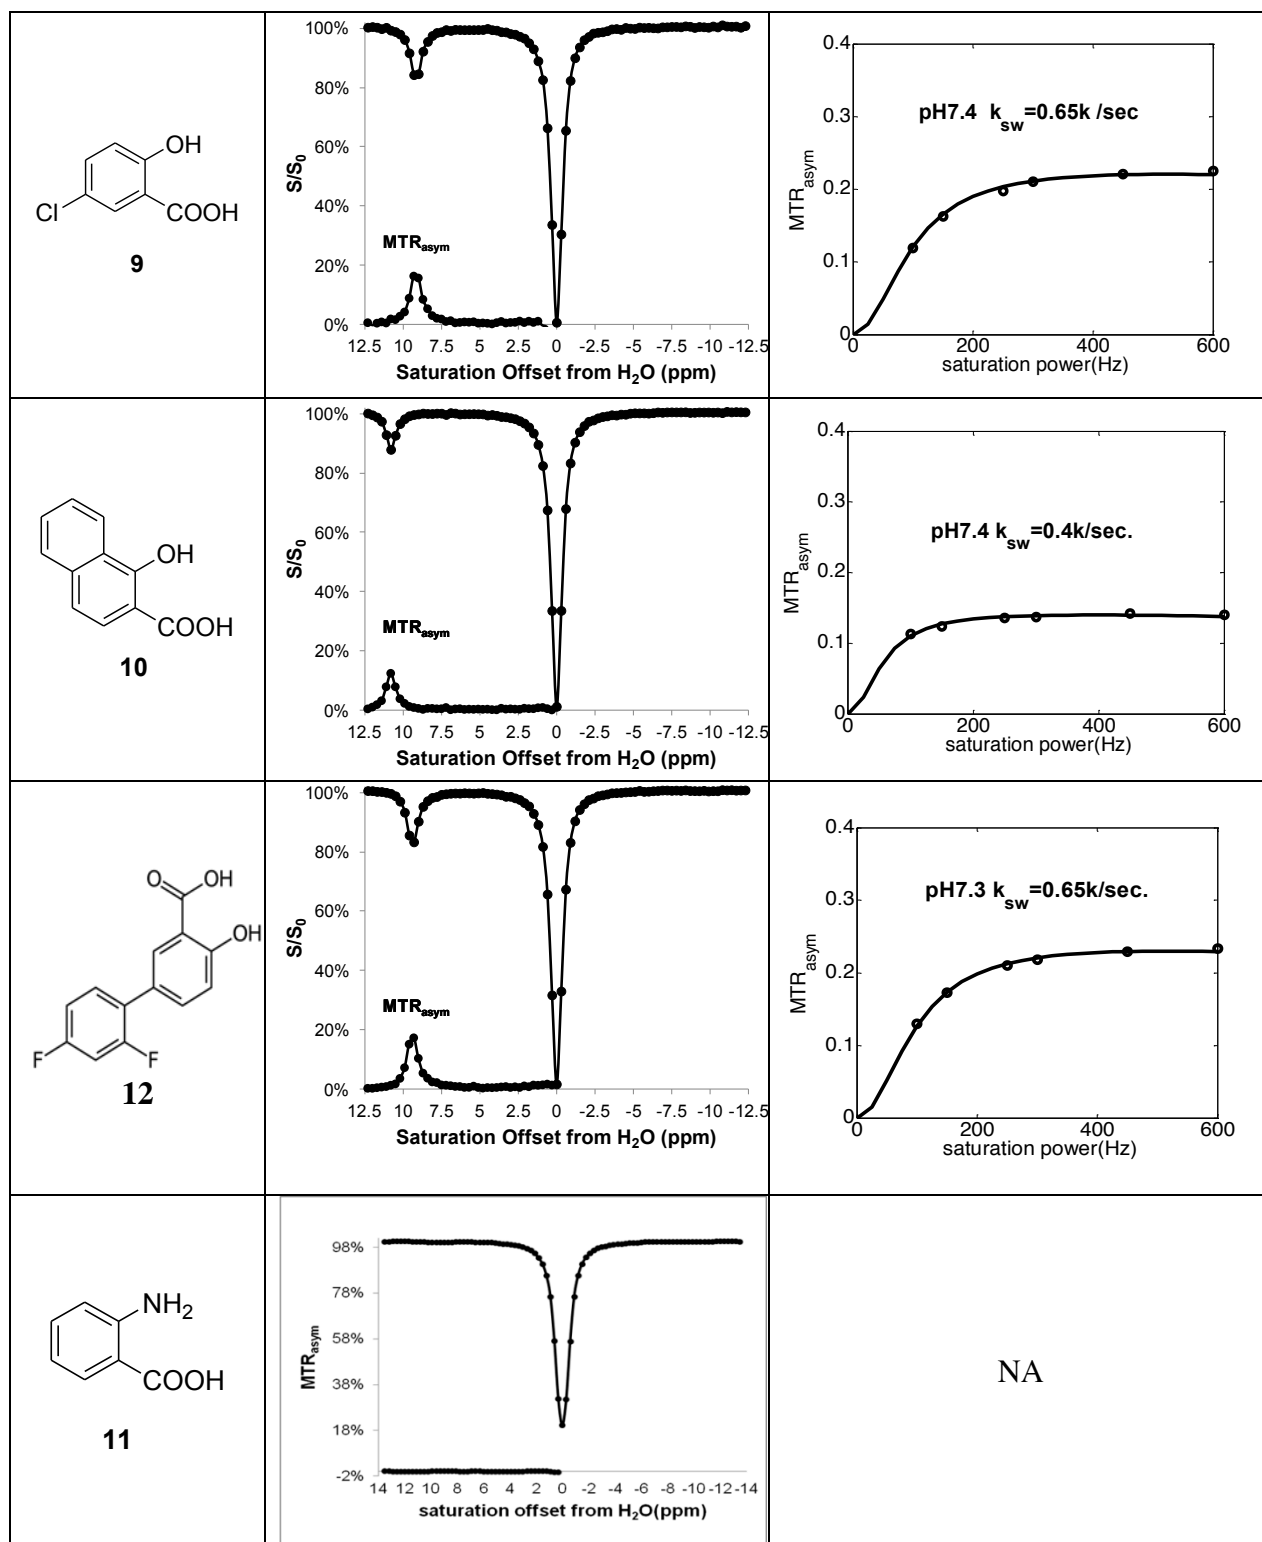

## 6. IN VIVO DATA

### A) *In vivo* data collection scheme 1



For the initial test, we started with an injection of 100  $\mu\text{l}$  of 250 mM compound **1** solution into the mouse tail vein (i.v.), and acquired CEST images using a saturation field strength of 5.9  $\mu\text{T}$ . A Z-spectrum was acquired before injection. For the dynamic CEST contrast measurements, we used a 6-offset scheme ( $\pm 9.6$  ppm,  $\pm 9.3$  ppm,  $\pm 9.0$  ppm, 5 min temporal resolution) after i.v. injection to ensure robustness to  $B_0$  inhomogeneity and high contrast-noise-ratio. The CEST contrast map was calculated with averaging over the 3 offsets (9.6 ppm, 9.3 ppm and 9.0 ppm). The kidney reached maximum CEST contrast at around 5 min, and then the contrast started decaying at 10 min. The Z-spectra are plotted in Figure S3, and the pre- and post- injection maps are shown in Table S3.

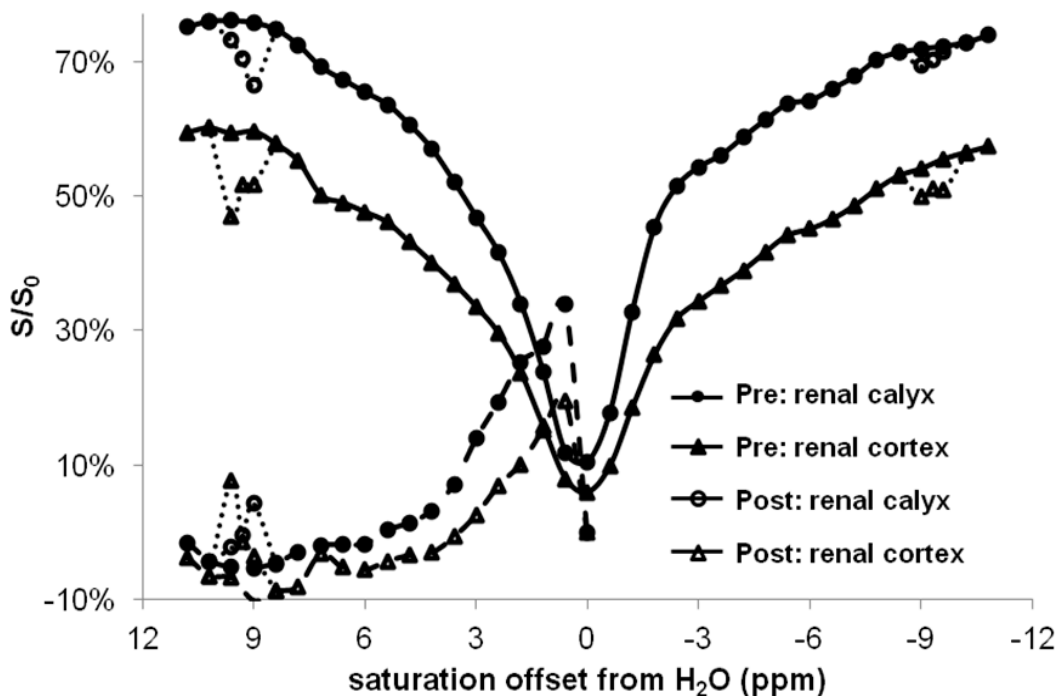

**Figure S3.** *In vivo* Z-spectra and  $\text{MTR}_{\text{asym}}$  spectra for renal calyx and cortex, acquired both pre-injection and at 5 min post-injection.

**Table S3.** Dynamic CEST contrast maps pre- and post- injection at 5.9  $\mu\text{T}$ .

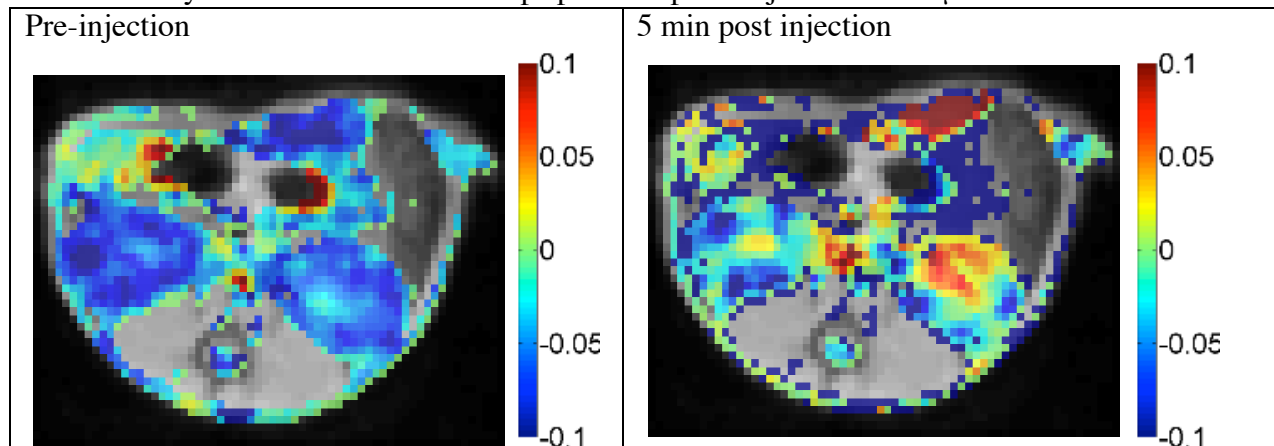

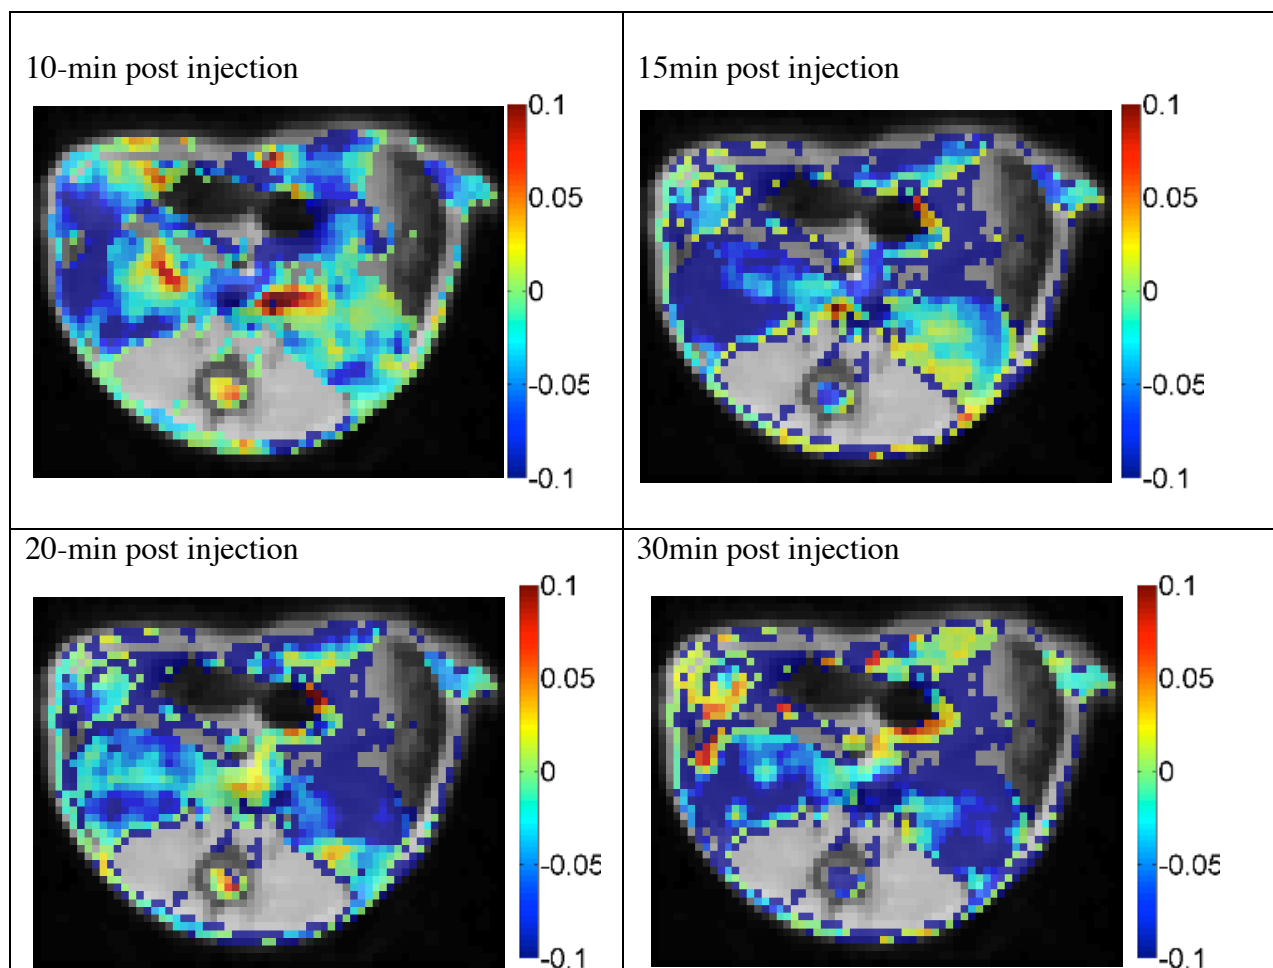

B) Scheme 2: Improved CEST imaging of kinetics:

According to the initial results in Figure S3 and Table S3, we modified the *in vivo* data collection scheme, in order to improve the kinetic data for compound **1** in the kidney. In addition, we further reduce the dose of agent to 60  $\mu\text{l}$  of 250 mM solution. Instead of time consuming 5.9  $\mu\text{T}$  6-offset, we used 7.2  $\mu\text{T}$  2 offset at 9.3 ppm and -9.3 ppm for the dynamic CEST image acquisition. For the image post-processing, the CEST contrast maps at 9.3 ppm was smoothed by adding a 2x2 medium filter and overlapped to the saturation weighted image at -9.3 ppm. Images at every two adjacent time points were also averaged to increase the contrast-noise-ratio, with a temporal resolution of 3 min. For 2 mice, the dynamic contrast maps are shown in Table S4.

**Table S4.** The dynamic contrast maps for two mice

| Entry | Time (min)   | Mouse 1 (0309M2)                                                                    | Mouse 2 (0311M3)                                                                     |
|-------|--------------|-------------------------------------------------------------------------------------|--------------------------------------------------------------------------------------|
| 1     | B0 Map       | 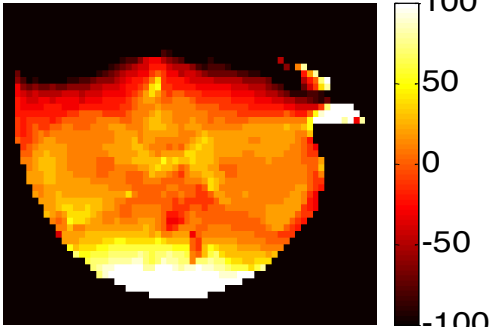   |    |
| 2     | 0 Pre-inject |   |   |
| 3     | 3            |  |  |
| 4     | 7            |  |  |

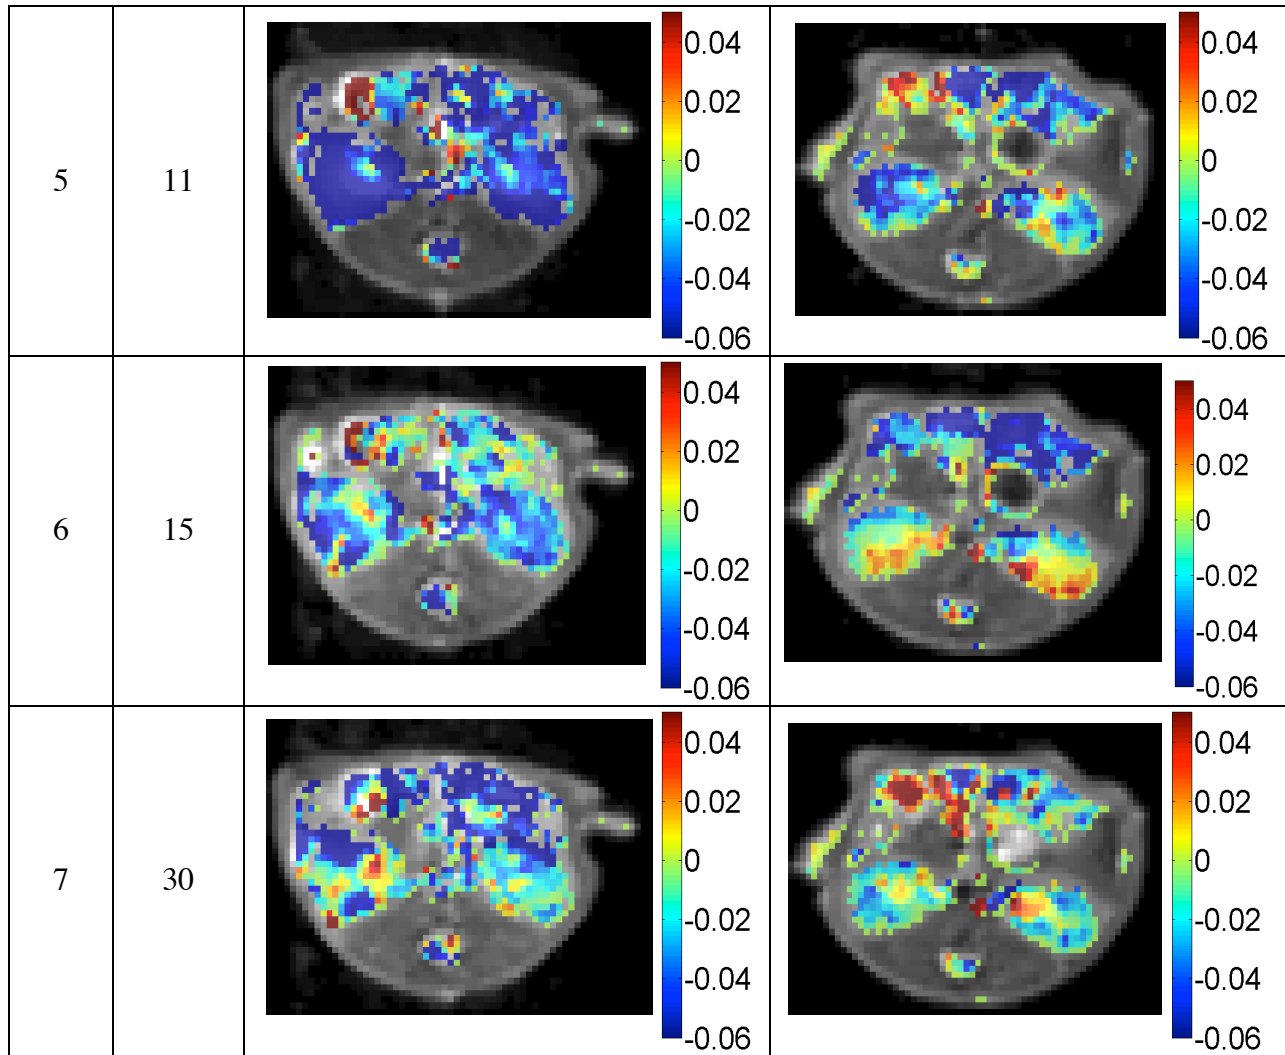

## 7. REFERENCES

- [1] M. T. McMahon, A. A. Gilad, J. Zhou, P. Z. Sun, J. W. M. Bulte, P. C. M. van Zijl, *Magn. Reson. Med.* **2006**, *55*, 836-847
- [2] D. L. Longo, W. Dastru, G. Digilio, J. Keupp, S. Langereis, S. Lanzardo, S. Prestigio, O. Steinbach, E. Terreno, F. Uggeri, S. Aime, *Magn. Reson. Med.* **2011**, *65*, 202-211.;
